# Supplementary material for: Effectiveness of Guided Breathing and Social Support for the Reduction of Pre-Exam Anxiety in University Students: A Factorial Study
Source: MDPI journal article supplement (doi:10.3390/healthcare11040574), 2023-02-15
Supplement: s1 [file s1]

## Escala GTAI-A

**Marca con una X o rodea con un círculo la puntuación más acorde a tu sentimiento con respecto a la realización del presente examen.**

**Sexo:**

**Curso académico:**

**Edad:**

|                                                                                    | <b>Casi nunca</b> | <b>En ocasiones</b> | <b>A menudo</b> | <b>Casi siempre</b> |
|------------------------------------------------------------------------------------|-------------------|---------------------|-----------------|---------------------|
| 1. Tengo seguridad en mi capacidad                                                 | <b>1</b>          | <b>2</b>            | <b>3</b>        | <b>4</b>            |
| 2. Pienso en la importancia que tiene el examen para mi                            | <b>1</b>          | <b>2</b>            | <b>3</b>        | <b>4</b>            |
| 3. Tengo una sensación rara en mi estomago                                         | <b>1</b>          | <b>2</b>            | <b>3</b>        | <b>4</b>            |
| 4. De repente se me cruzan pensamientos por la cabeza que me bloquean              | <b>1</b>          | <b>2</b>            | <b>3</b>        | <b>4</b>            |
| 5. Me preocupa saber si podré afrontarlo                                           | <b>1</b>          | <b>2</b>            | <b>3</b>        | <b>4</b>            |
| 6. Siento mi cuerpo tensionado                                                     | <b>1</b>          | <b>2</b>            | <b>3</b>        | <b>4</b>            |
| 7. Tengo confianza en mi propio desempeño                                          | <b>1</b>          | <b>2</b>            | <b>3</b>        | <b>4</b>            |
| 8. Pienso en las consecuencias de fracasar                                         | <b>1</b>          | <b>2</b>            | <b>3</b>        | <b>4</b>            |
| 9. Me pregunto si mi rendimiento será lo suficientemente bueno                     | <b>1</b>          | <b>2</b>            | <b>3</b>        | <b>4</b>            |
| 10. Pienso en cualquier cosa y me distraigo                                        | <b>1</b>          | <b>2</b>            | <b>3</b>        | <b>4</b>            |
| 11. Me siento incómodo/a                                                           | <b>1</b>          | <b>2</b>            | <b>3</b>        | <b>4</b>            |
| 12. Sé que puedo confiar en mí mismo/a                                             | <b>1</b>          | <b>2</b>            | <b>3</b>        | <b>4</b>            |
| 13. Pienso en lo mucho que me importa obtener un buen resultado                    | <b>1</b>          | <b>2</b>            | <b>3</b>        | <b>4</b>            |
| 14. Fácilmente pierdo el hilo de mis pensamientos                                  | <b>1</b>          | <b>2</b>            | <b>3</b>        | <b>4</b>            |
| 15. Siento que mi corazón me late fuerte                                           | <b>1</b>          | <b>2</b>            | <b>3</b>        | <b>4</b>            |
| 16. Me preocupo por el resultado de mi examen                                      | <b>1</b>          | <b>2</b>            | <b>3</b>        | <b>4</b>            |
| 17. Me siento ansioso/a                                                            | <b>1</b>          | <b>2</b>            | <b>3</b>        | <b>4</b>            |
| 18. Otros problemas personales me interfieren y no me permiten recordar las cosas. | <b>1</b>          | <b>2</b>            | <b>3</b>        | <b>4</b>            |
| 19. Me siento conforme conmigo mismo/a                                             | <b>1</b>          | <b>2</b>            | <b>3</b>        | <b>4</b>            |
| 20. Me preocupa cómo se verá mi calificación                                       | <b>1</b>          | <b>2</b>            | <b>3</b>        | <b>4</b>            |
| 21. Tiemblo de nerviosismo                                                         | <b>1</b>          | <b>2</b>            | <b>3</b>        | <b>4</b>            |

|                                                                                 |          |          |          |          |
|---------------------------------------------------------------------------------|----------|----------|----------|----------|
| 22.Me preocupa que algo pueda salirme mal                                       | <b>1</b> | <b>2</b> | <b>3</b> | <b>4</b> |
| 23.Me llama la atención algo de poca importancia que interrumpe mi razonamiento | <b>1</b> | <b>2</b> | <b>3</b> | <b>4</b> |
| 24.Tengo una sensación de angustia                                              | <b>1</b> | <b>2</b> | <b>3</b> | <b>4</b> |
| 25.Confío que lograre hacerlo todo                                              | <b>1</b> | <b>2</b> | <b>3</b> | <b>4</b> |
| 26.Pienso en lo que pasará si me va mal                                         | <b>1</b> | <b>2</b> | <b>3</b> | <b>4</b> |
| 27.Me siento nervioso/a                                                         | <b>1</b> | <b>2</b> | <b>3</b> | <b>4</b> |
| 28.Estoy convencido de que haré bien el examen                                  | <b>1</b> | <b>2</b> | <b>3</b> | <b>4</b> |

**GRACIAS POR TU PARTICIPACIÓN**

## Escala GTAI-A

**Mark with an X or circle the score that most closely matches your feelings about taking this test.**

**Sex:**

**Academic Course:**

**Age:**

|                                                                                          | <b>Casi nunca</b> | <b>En ocasiones</b> | <b>A menudo</b> | <b>Casi siempre</b> |
|------------------------------------------------------------------------------------------|-------------------|---------------------|-----------------|---------------------|
| 1. I am confident in my ability                                                          | <b>1</b>          | <b>2</b>            | <b>3</b>        | <b>4</b>            |
| 2. I think about how important the exam is to me.                                        | <b>1</b>          | <b>2</b>            | <b>3</b>        | <b>4</b>            |
| 3. I have a weird feeling in my stomach.                                                 | <b>1</b>          | <b>2</b>            | <b>3</b>        | <b>4</b>            |
| 4. Suddenly thoughts cross my mind and block me.                                         | <b>1</b>          | <b>2</b>            | <b>3</b>        | <b>4</b>            |
| 5. I am worried about whether I will be able to cope with it.                            | <b>1</b>          | <b>2</b>            | <b>3</b>        | <b>4</b>            |
| 6. I feel my body tense                                                                  | <b>1</b>          | <b>2</b>            | <b>3</b>        | <b>4</b>            |
| 7. I have confidence on my own performance                                               | <b>1</b>          | <b>2</b>            | <b>3</b>        | <b>4</b>            |
| 8. I think about the consequences of failure                                             | <b>1</b>          | <b>2</b>            | <b>3</b>        | <b>4</b>            |
| 9. I wonder if my performance will be good enough.                                       | <b>1</b>          | <b>2</b>            | <b>3</b>        | <b>4</b>            |
| 10. I think about anything and I get distracted.                                         | <b>1</b>          | <b>2</b>            | <b>3</b>        | <b>4</b>            |
| 11. I feel uncomfortable                                                                 | <b>1</b>          | <b>2</b>            | <b>3</b>        | <b>4</b>            |
| 12. I know I can trust myself                                                            | <b>1</b>          | <b>2</b>            | <b>3</b>        | <b>4</b>            |
| 13. I think about how much I care about getting a good result.                           | <b>1</b>          | <b>2</b>            | <b>3</b>        | <b>4</b>            |
| 14. I easily lose my train of thought.                                                   | <b>1</b>          | <b>2</b>            | <b>3</b>        | <b>4</b>            |
| 15. I feel my heart pounding                                                             | <b>1</b>          | <b>2</b>            | <b>3</b>        | <b>4</b>            |
| 16. I worry about my exam result.                                                        | <b>1</b>          | <b>2</b>            | <b>3</b>        | <b>4</b>            |
| 17. I feel anxious                                                                       | <b>1</b>          | <b>2</b>            | <b>3</b>        | <b>4</b>            |
| 18. Other personal problems interfere with me and prevent me from remembering things.    | <b>1</b>          | <b>2</b>            | <b>3</b>        | <b>4</b>            |
| 19. I feel happy with myself                                                             | <b>1</b>          | <b>2</b>            | <b>3</b>        | <b>4</b>            |
| 20. I worry about how my grade will look                                                 | <b>1</b>          | <b>2</b>            | <b>3</b>        | <b>4</b>            |
| 21. I shake with nervousness                                                             | <b>1</b>          | <b>2</b>            | <b>3</b>        | <b>4</b>            |
| 22. I worry that something might go wrong                                                | <b>1</b>          | <b>2</b>            | <b>3</b>        | <b>4</b>            |
| 23. My attention is drawn to something of little importance that interrupts my reasoning | <b>1</b>          | <b>2</b>            | <b>3</b>        | <b>4</b>            |
| 24. I have a feeling of anguish                                                          | <b>1</b>          | <b>2</b>            | <b>3</b>        | <b>4</b>            |
| 25. I am confident that I will get everything done                                       | <b>1</b>          | <b>2</b>            | <b>3</b>        | <b>4</b>            |

|                                                        |          |          |          |          |
|--------------------------------------------------------|----------|----------|----------|----------|
| 26.I think about what will happen if I do not do well. | <b>1</b> | <b>2</b> | <b>3</b> | <b>4</b> |
| 27.I feel nervous                                      | <b>1</b> | <b>2</b> | <b>3</b> | <b>4</b> |
| 28.I am convinced that I will do well in the exam.     | <b>1</b> | <b>2</b> | <b>3</b> | <b>4</b> |
